# Supplementary material for: Ratiometric pH sensor based on mesoporous silica nanoparticles and Förster resonance energy transfer
Source: Royal Society of Chemistry journal article supplement (doi:10.1039/c0cc03310c), 2010-01-01
Supplement: c0cc03310c.pdf [file c0cc03310c.pdf]

# Supporting Information

## Ratiometric pH sensor based on mesoporous silica nanoparticles and Förster resonance energy transfer

Juying Lei, Lingzhi Wang\* and Jinlong Zhang\*

Lab for Advanced Materials and Institute of Fine Chemicals, East China University of Science and Technology, Shanghai, PR China.

### 1. Synthesis and characterization of the FRET dye pair doped mesoporous silica nanoparticles (FMSNs)

Fluorescein isothiocyanate (FITC) was used as the pH sensitive dye and Rhodamine B isothiocyanate (RBITC) as the reference dye. They were first modified with 3-aminopropyltriethoxysilane (APTS) respectively. Typically, 4.6 mg of FITC or 6.3 mg of RBITC was dissolved in 1136  $\mu\text{L}$  of EtOH and was allowed to react with 50  $\mu\text{L}$  APTS for overnight in the dark. NaOH (0.7 mL, 2 M) was added to 100 mL of cetyltrimethylammonium bromide (CTAB) solution ( $5.5 \times 10^{-3}$  M). The mixture was heated to 70  $^{\circ}\text{C}$ , followed by the addition of 1.0 mL of tetraethylorthosilicate (TEOS) and 100  $\mu\text{L}$  of APTS-modified dye solution (a mixture of FITC-APTS solution and RBITC-APTS solution in various proportions). After 1 min, 1.0 mL of ethyl acetate was added, and the resulting mixture was stirred at 70  $^{\circ}\text{C}$  for 30 s and then aged for 2 h. After the solution had cooled to roomtemperature, the precipitate was collected by centrifugation and washed with water and ethanol several times. Finally, the pore-generating template, CTAB, was removed by refluxing in acidic ethanol solution.

## 2. Characterization of the FMSNs

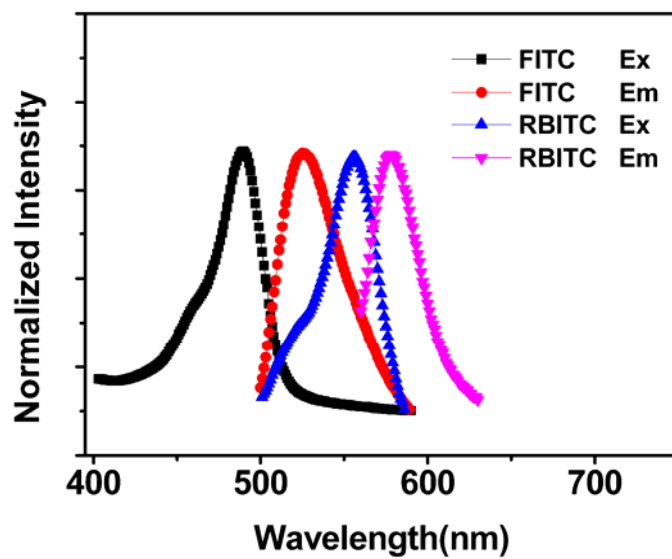

Fig. S1. Excitation and emission Spectra of FITC and RBITC

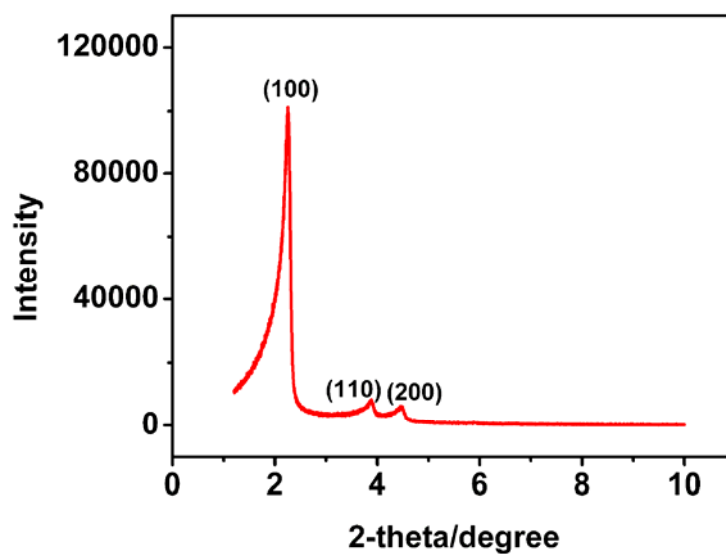

Fig. S2. Low-angle XRD pattern of FMNSs.

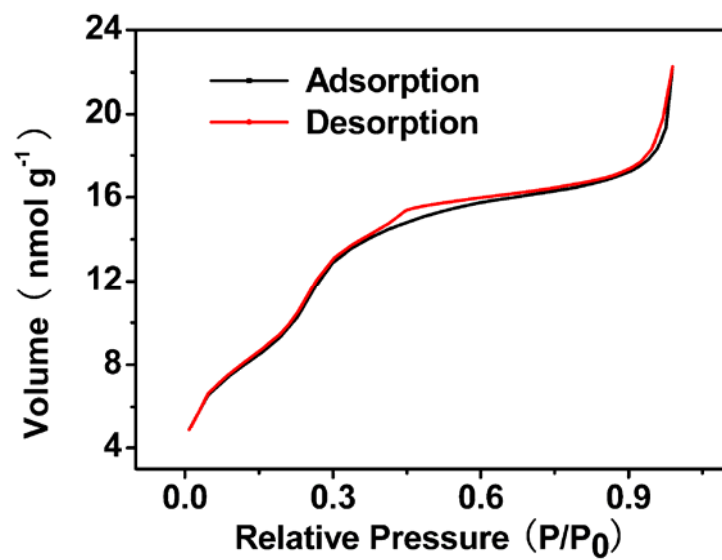

Fig. S3 Nitrogen adsorption-desorption isotherms of FMNSs

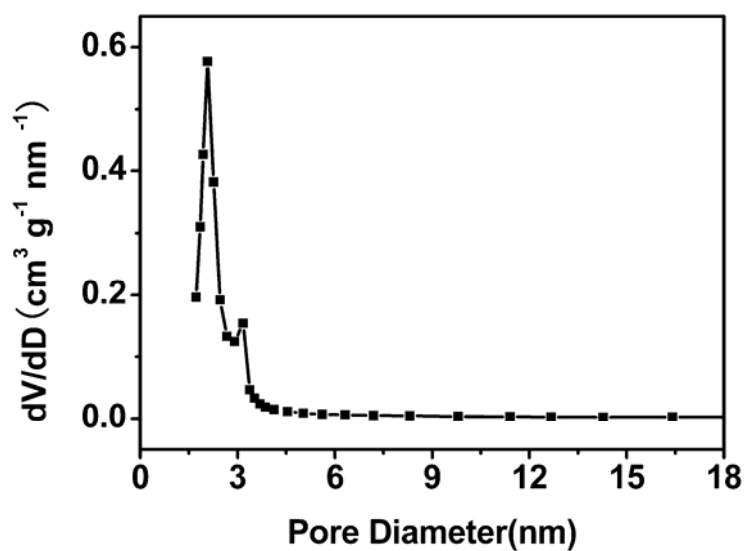

Fig. S4. Pore size distribution of FMSNs.
